# Supplementary material for: Identification and Functional Analysis of bZIP Genes in Cotton Response to Drought Stress
Source: MDPI journal article supplement (doi:10.3390/ijms232314894), 2022-11-28
Supplement: s1 [file s1]

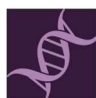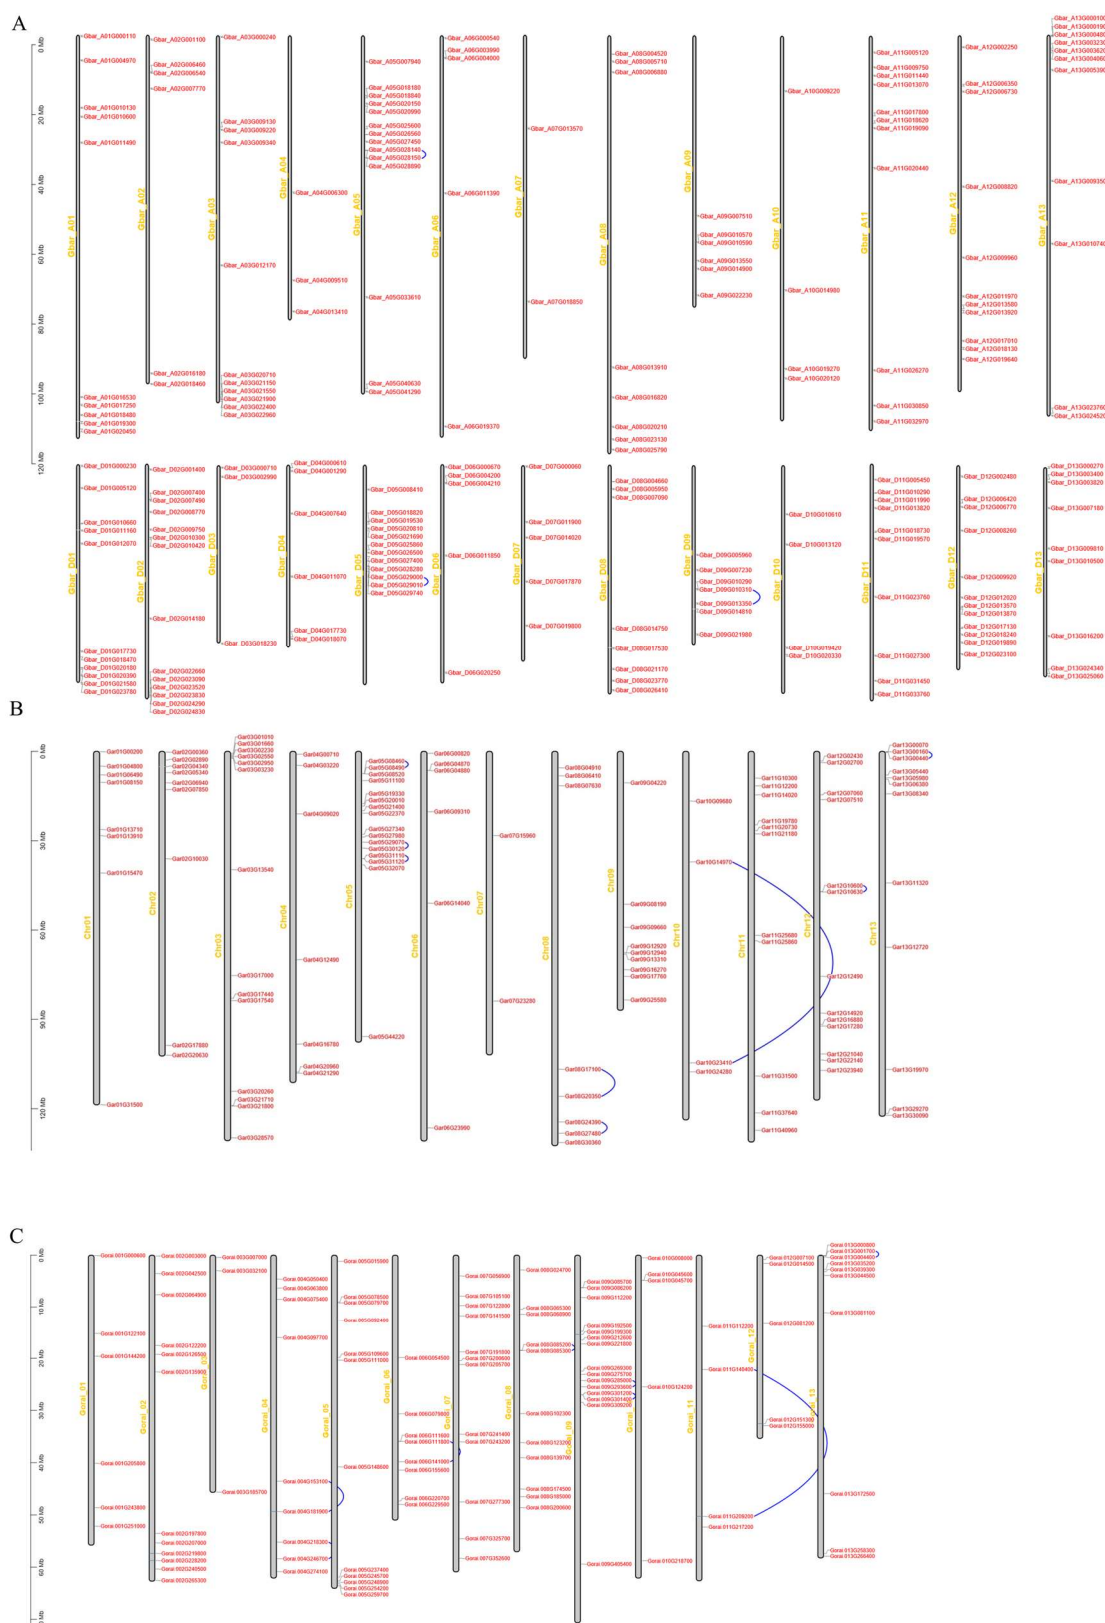

**Figure S1.** Genomic distribution of bZIP genes on the chromosomes of *G. barbardense*, *G. arboreum* and *G. raimondii*.

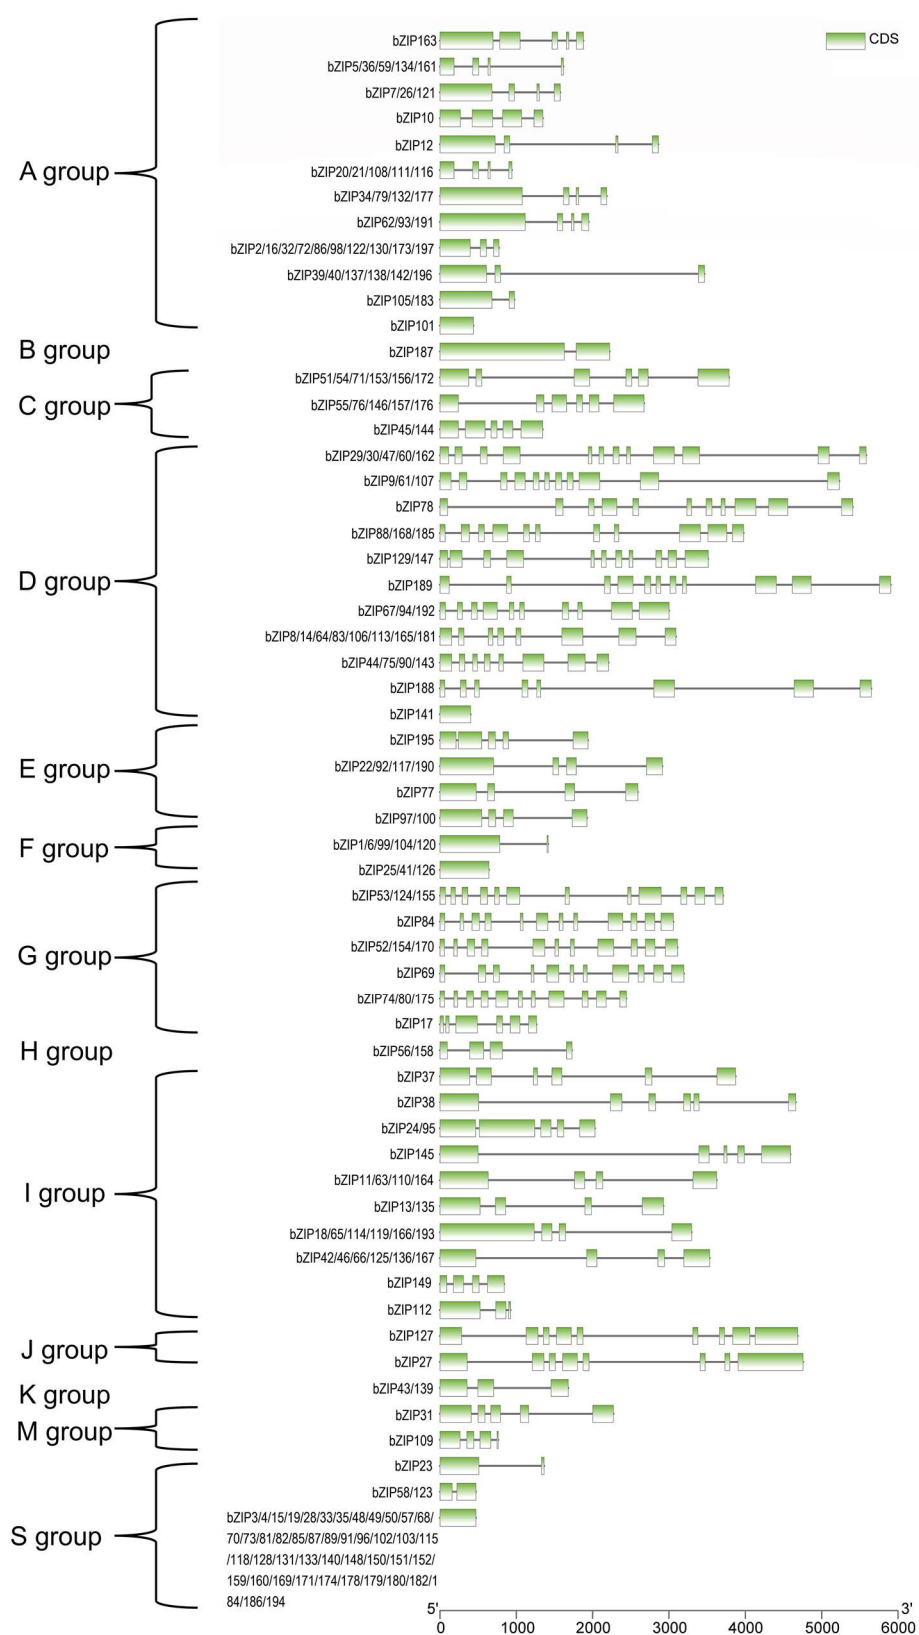

**Figure S2.** Exon/intron organization of GhbZIP genes depicted for each group.

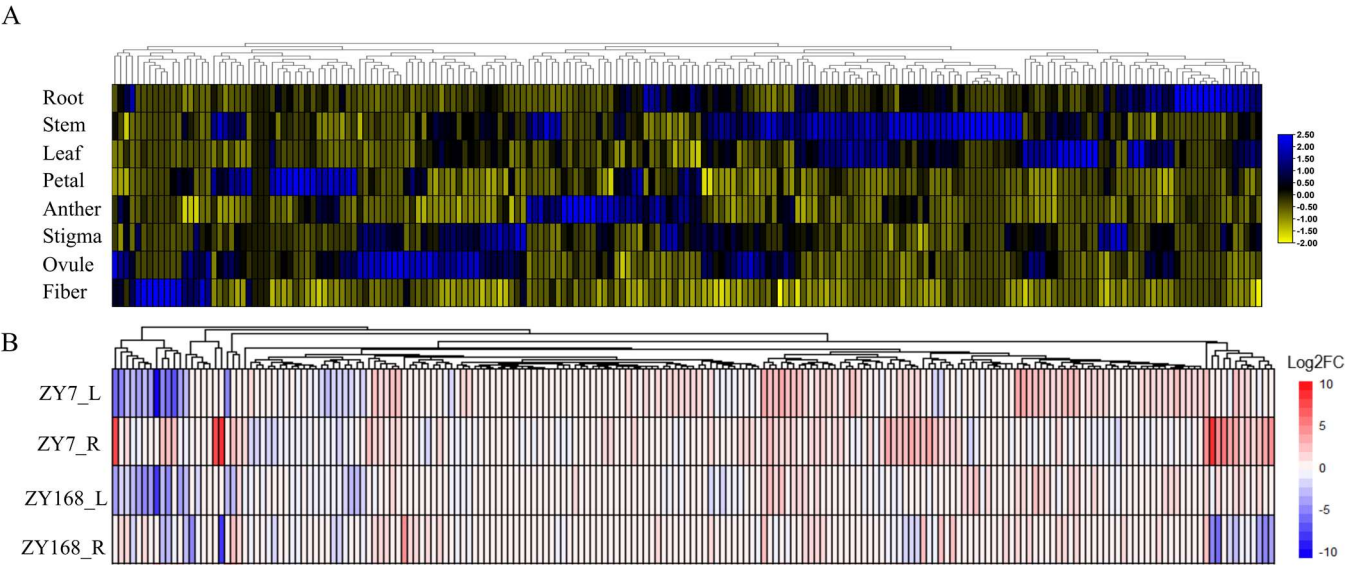

**Figure S3.** The expression patterns of GhbZIP genes in different tissues/organs and under drought treatment.
